# Supplementary material for: Guettarda crispiflora Vahl Methanol Extract Ameliorates Acute Lung Injury and Gastritis by Suppressing Src Phosphorylation
Source: MDPI journal article supplement (doi:10.3390/plants11243560), 2022-12-16
Supplement: s1 [file s1]

# *Guettarda crispiflora* Vahl Methanol Extract Ameliorates Acute Lung Injury and Gastritis by Suppressing Src Phosphorylation

Dahae Lee <sup>1,†</sup>, Ji Won Kim <sup>1,†</sup>, Chae Young Lee <sup>1</sup>, Jieun Oh <sup>1</sup>, So Hyun Hwang <sup>1</sup>, Minkyong Jo <sup>1</sup>,  
Seung A Kim <sup>1</sup>, Wooram Choi <sup>1</sup>, Jin Kyoung Noh <sup>2</sup>, Dong-Keun Yi <sup>3</sup>, Minkyung Song <sup>1,\*</sup>,  
Han Gyung Kim <sup>1,4,5,\*</sup> and Jae Youl Cho <sup>1,4,5,\*</sup>

<sup>1</sup> Department of Integrative Biotechnology, Sungkyunkwan University, Suwon 16419, Republic of Korea

<sup>2</sup> Instituto de BioEconomia, Quito 170135, Ecuador

<sup>3</sup> International Biological Material Research Center, Korea Research Institute of Bioscience and Biotechnology, Daejeon 34141, Republic of Korea

<sup>4</sup> Research Institute of Biomolecule Control, Sungkyunkwan University, Suwon 16419, Republic of Korea

<sup>5</sup> Biomedical Institute for Convergence at SKKU, Sungkyunkwan University, Suwon 16419, Republic of Korea

\* Correspondence: pisesmk@skku.edu (M.S.); hanks523@skku.edu (H.G.K.); jaecho@skku.edu (J.Y.C.)

† These authors equally contributed to this work.

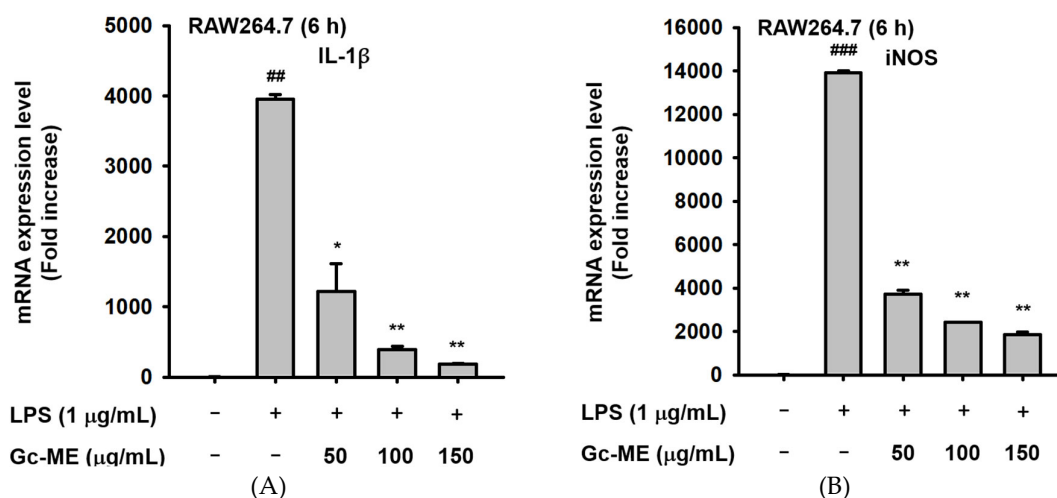

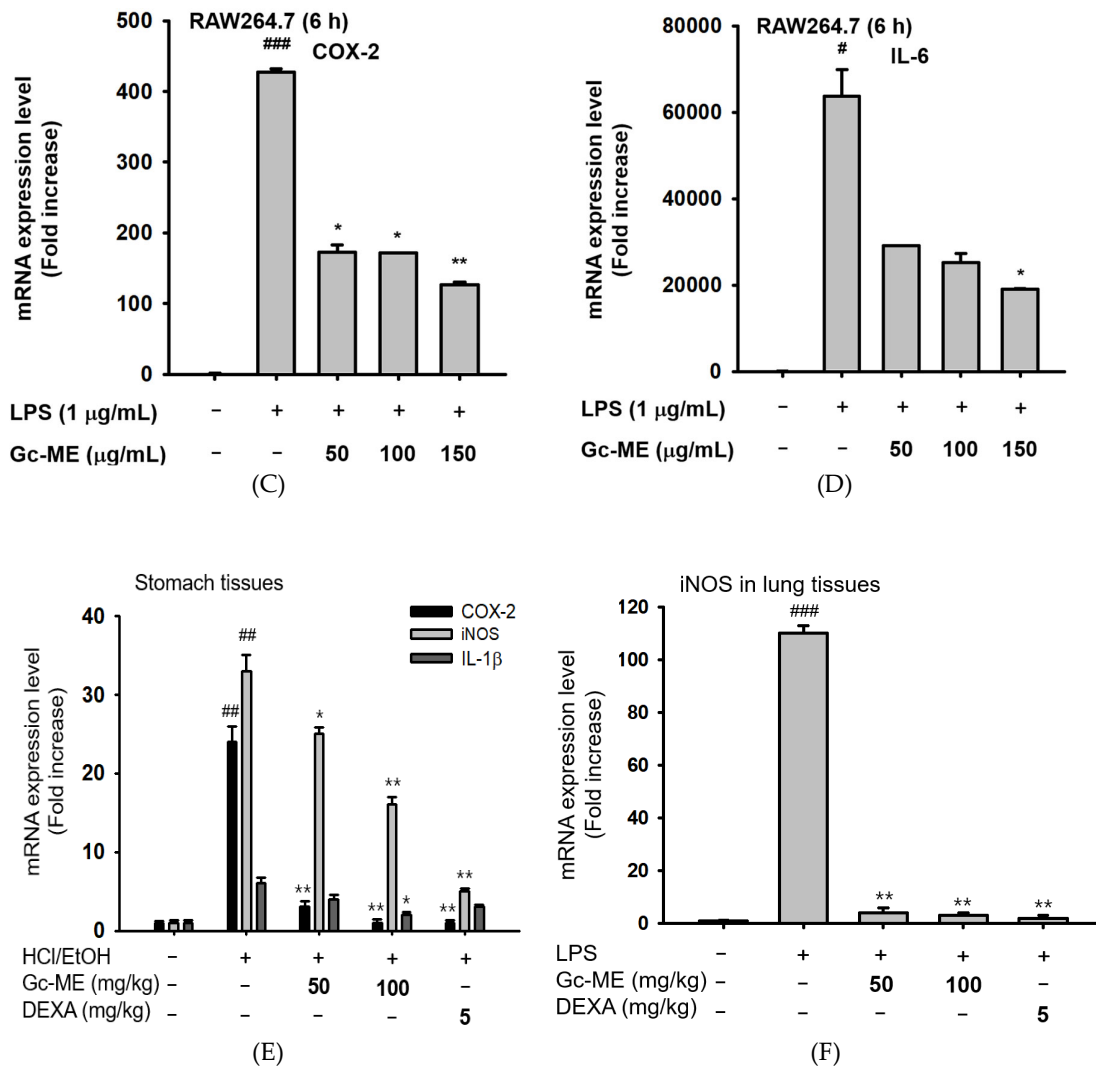

Figure S1. The inhibitory effect of Gc-ME on the expression of pro-inflammatory genes. (A-F) mRNA levels of pro-inflammatory genes (IL-1 $\beta$ , iNOS, COX-2 and IL-6) were measured by real-time PCR (qRT-PCR) with RNA samples prepared from LPS-treated RAW264.7 cells pretreated with Gc-ME for 30 min (A-D) or tissue (stomach and lung) lysates from Gc-ME-administered mice treated with HCl/EtOH or LPS (E and F). Results (A-F) are expressed as mean  $\pm$  standard deviation. #:  $p < 0.05$ , ###:  $p < 0.01$ , and ###:  $p < 0.001$  compared to control group (no treatment); \*:  $p < 0.05$  and \*\*:  $p < 0.01$  compared to control group (LPS alone) by Student's *t*-test; -, no treatment; +, treatment.

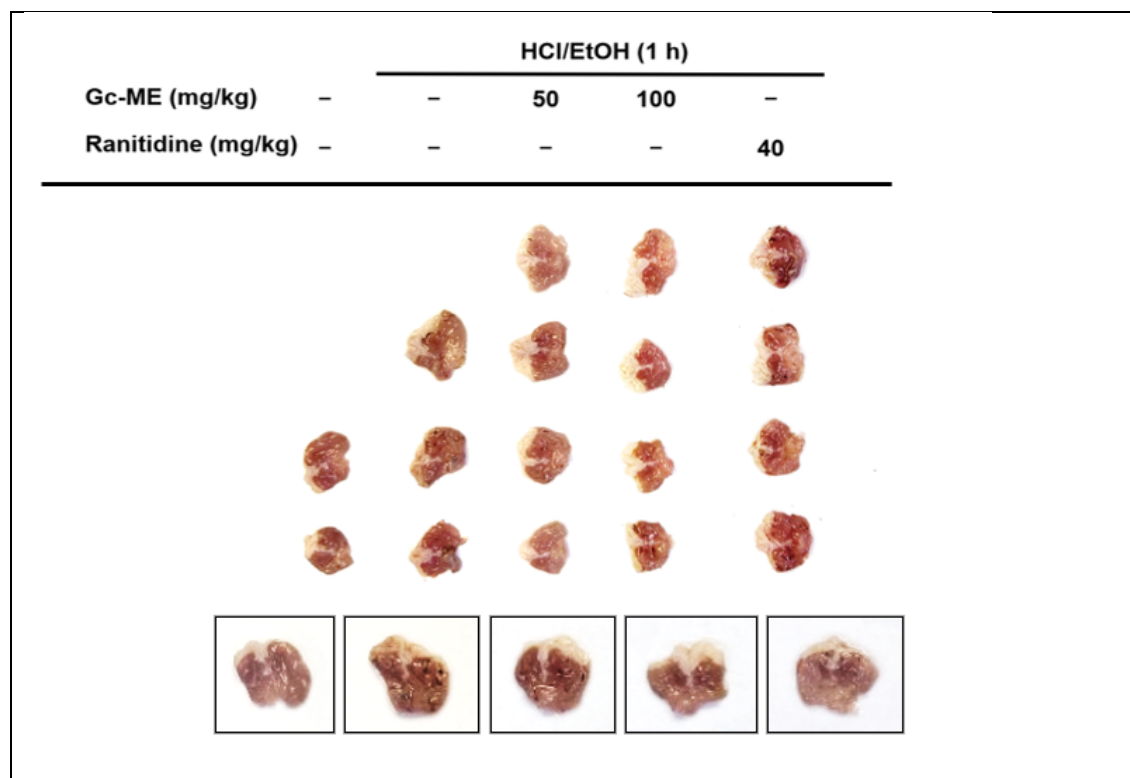

Figure S2. The inhibitory effect of Gc-ME on the induction of gastric lesion in stomach of mice treated with HCl/EtOH and Gc-ME. Photos of stomachs were taken with a digital camera.
